# Supplementary material
Source: PubMed Central journal article supplement (PMC6917412)

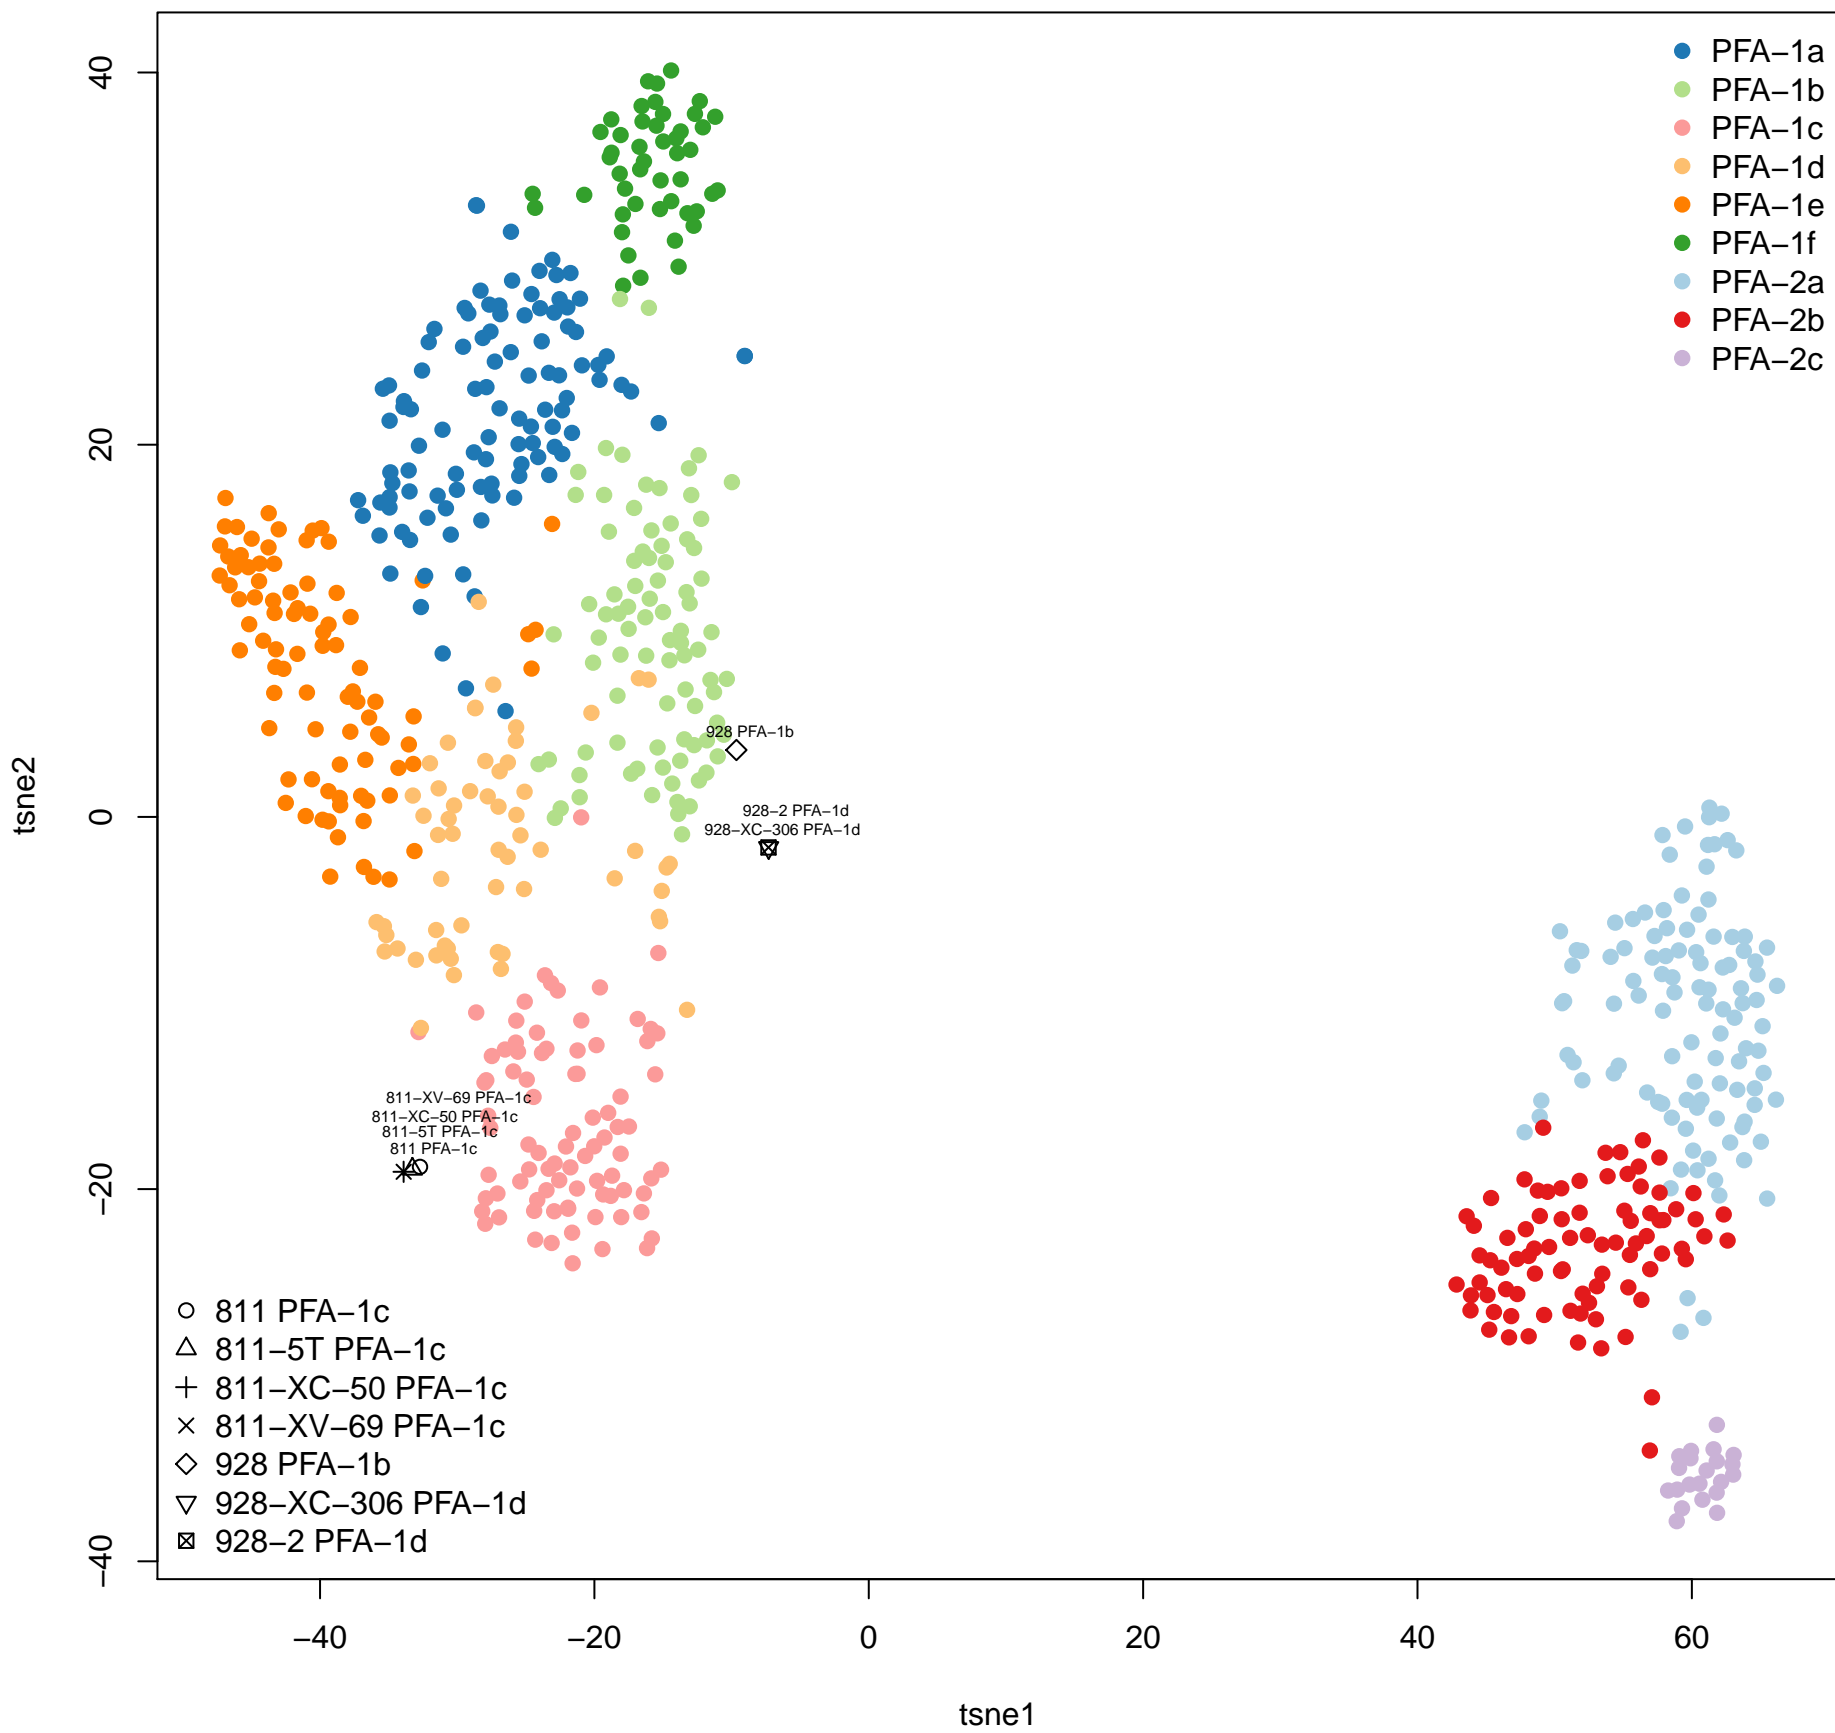

Supplement: noz116_suppl_supplementary_figure7.pdf [file noz116_suppl_supplementary_figure7.pdf]
